# Supplementary material
Source: PubMed Central journal article supplement (PMC3794895)

**A**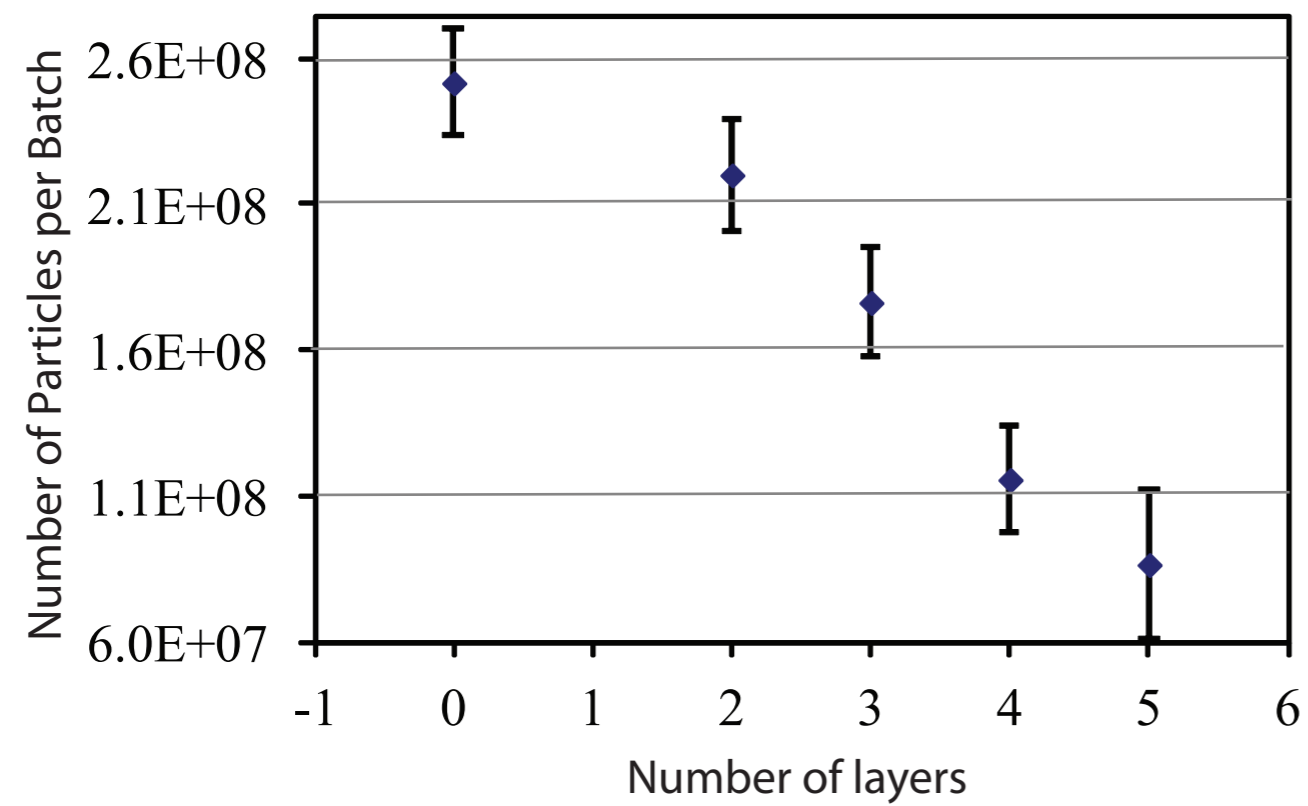**B**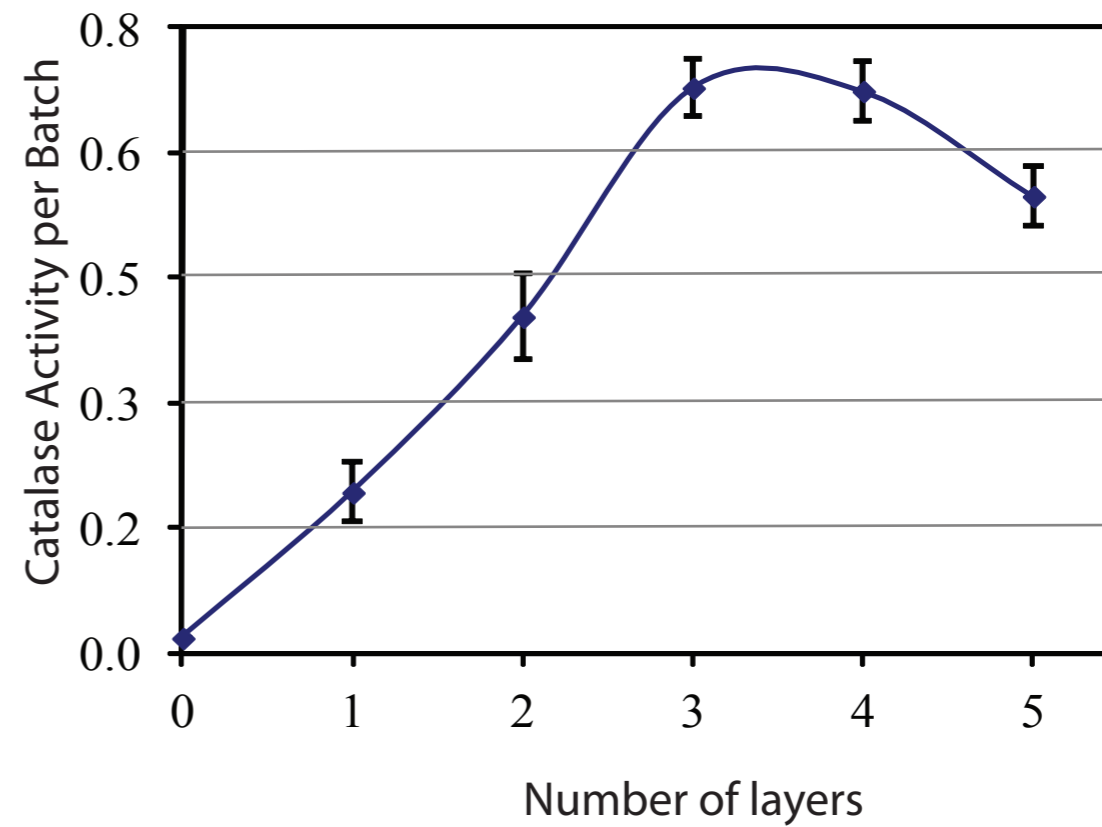**C**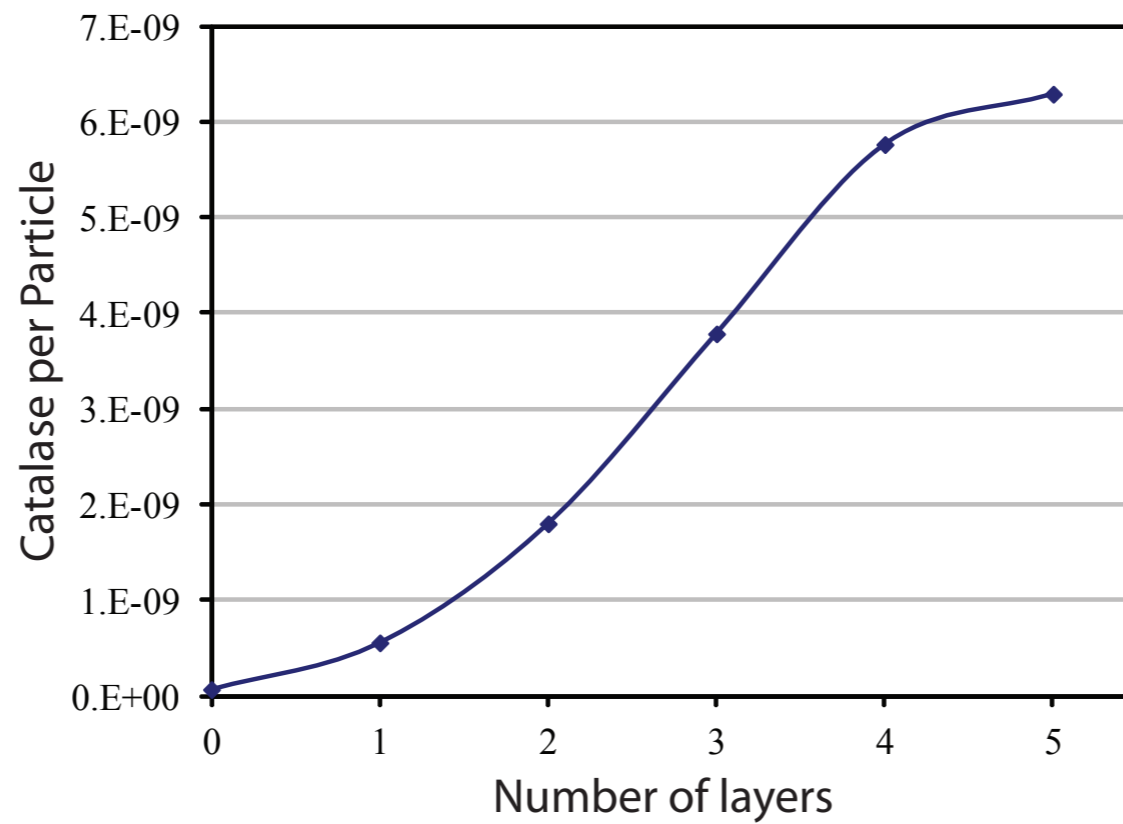

Supplement: NIHMS502188-supplement-1.pdf [file NIHMS502188-supplement-1.pdf]

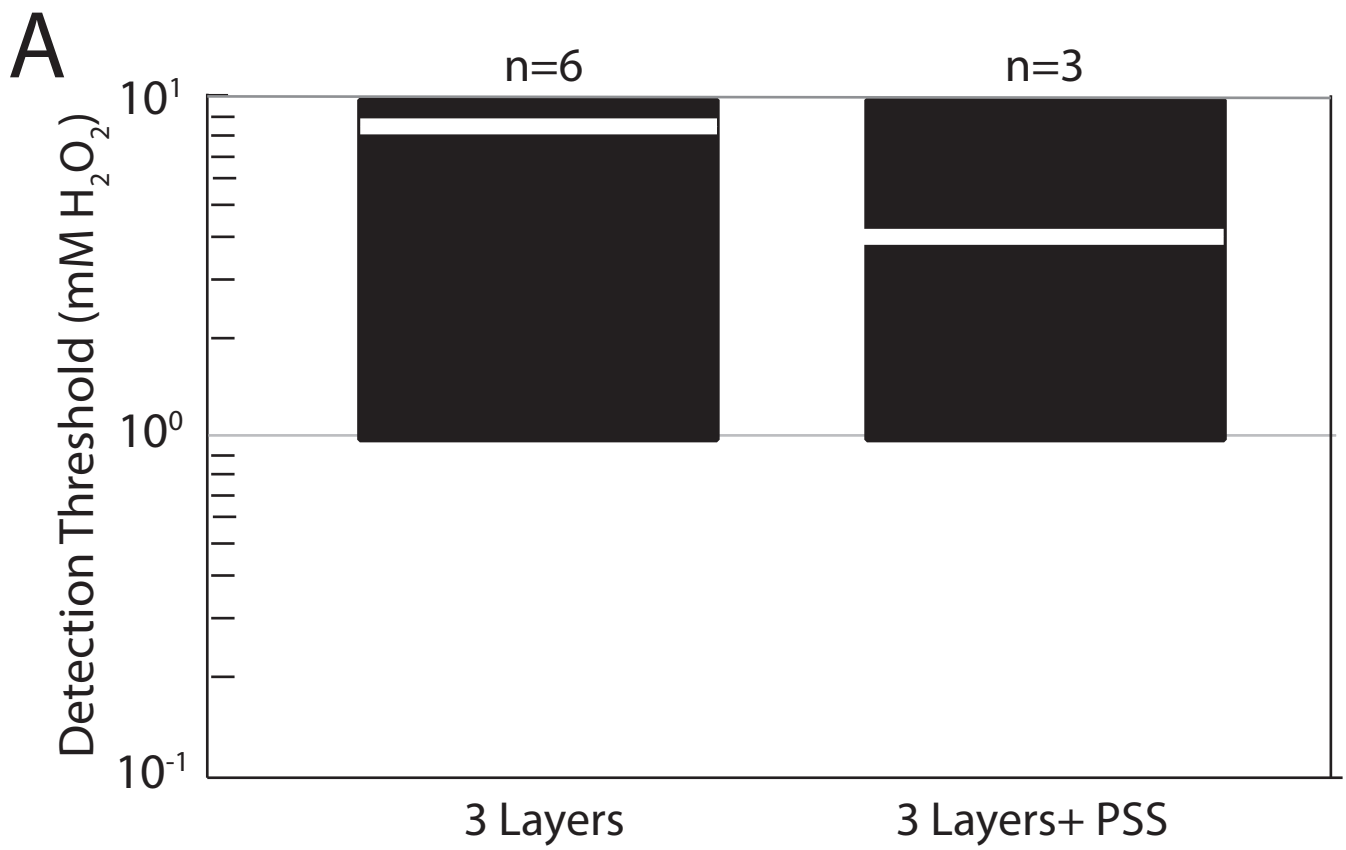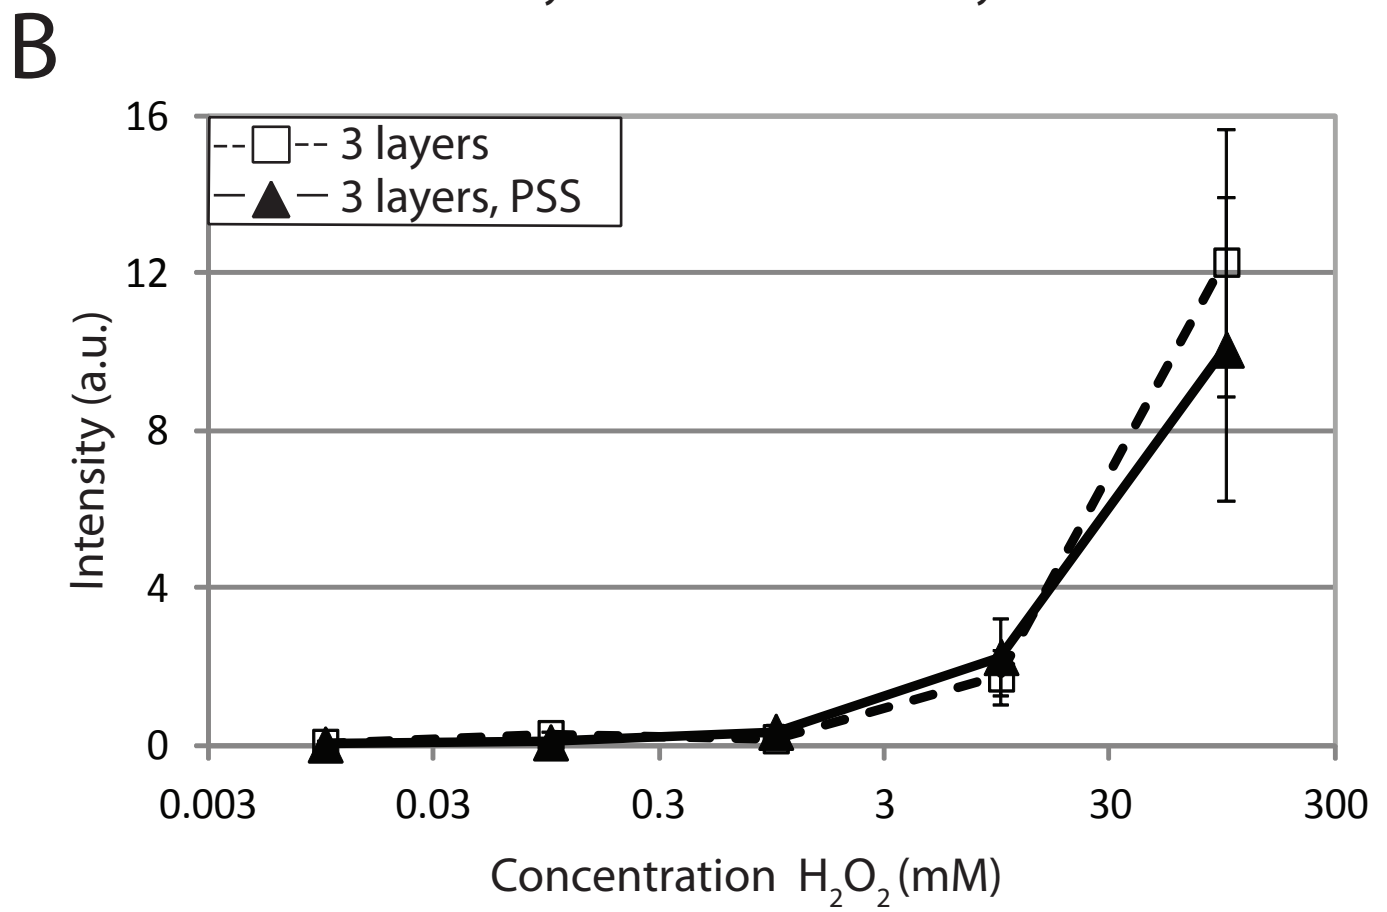

Supplement: NIHMS502188-supplement-2.pdf [file NIHMS502188-supplement-2.pdf]

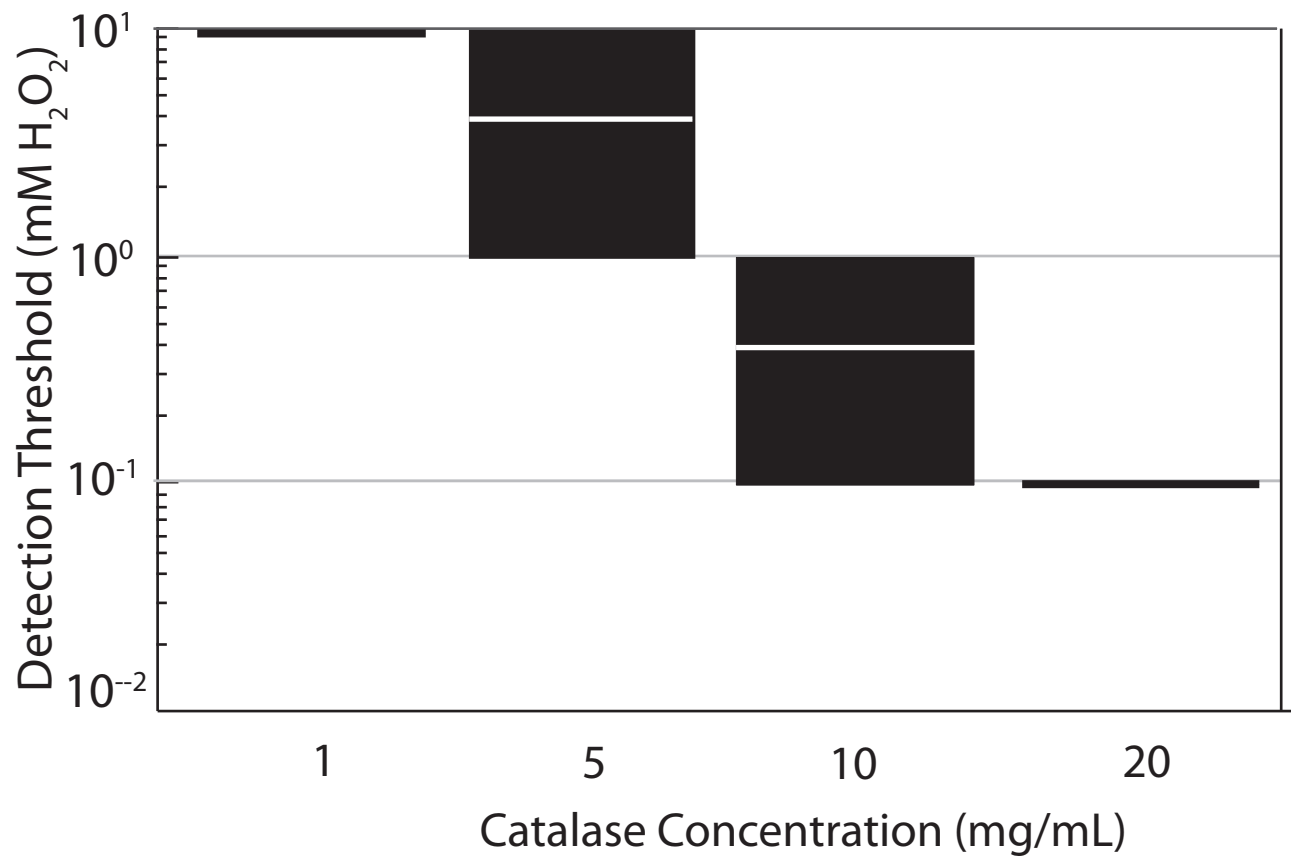

Supplement: NIHMS502188-supplement-3.pdf [file NIHMS502188-supplement-3.pdf]

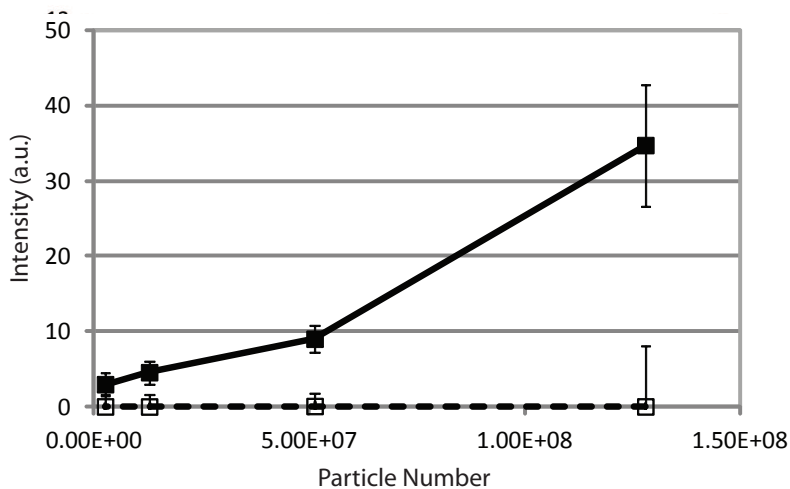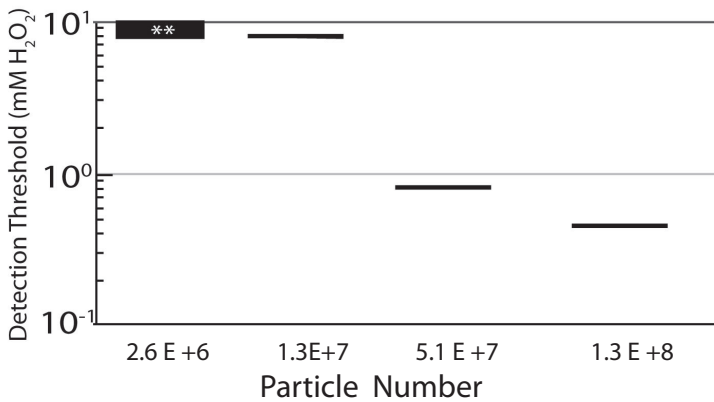

Supplement: NIHMS502188-supplement-4.pdf [file NIHMS502188-supplement-4.pdf]

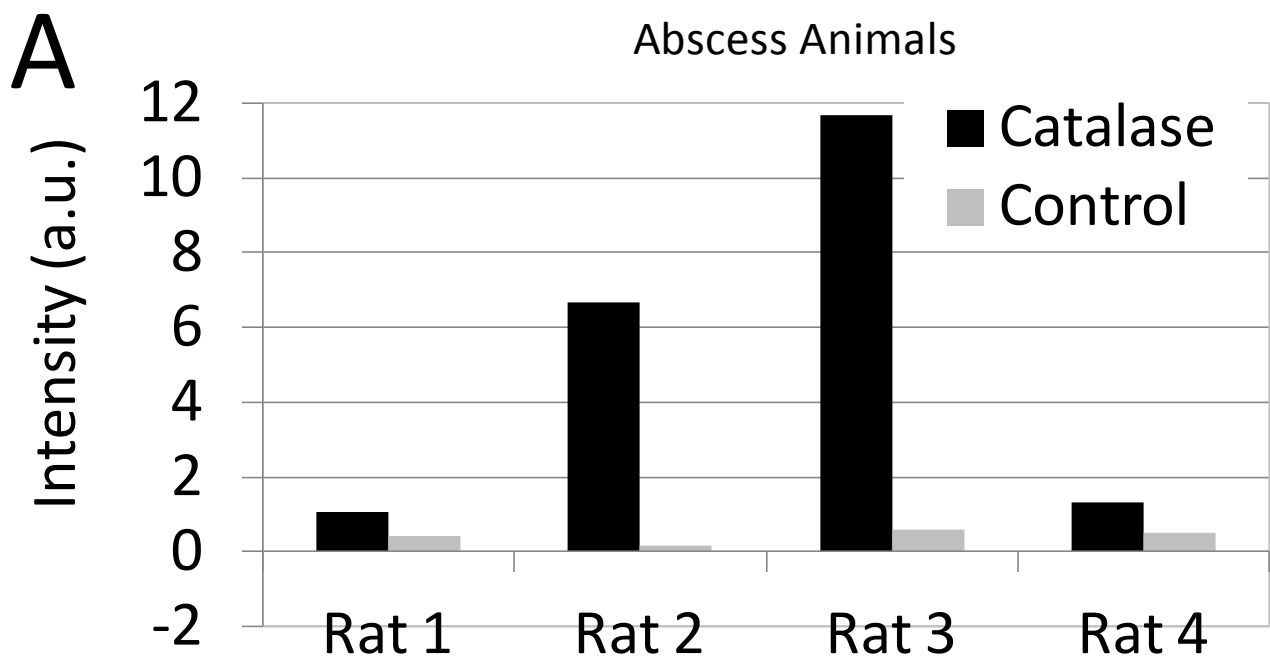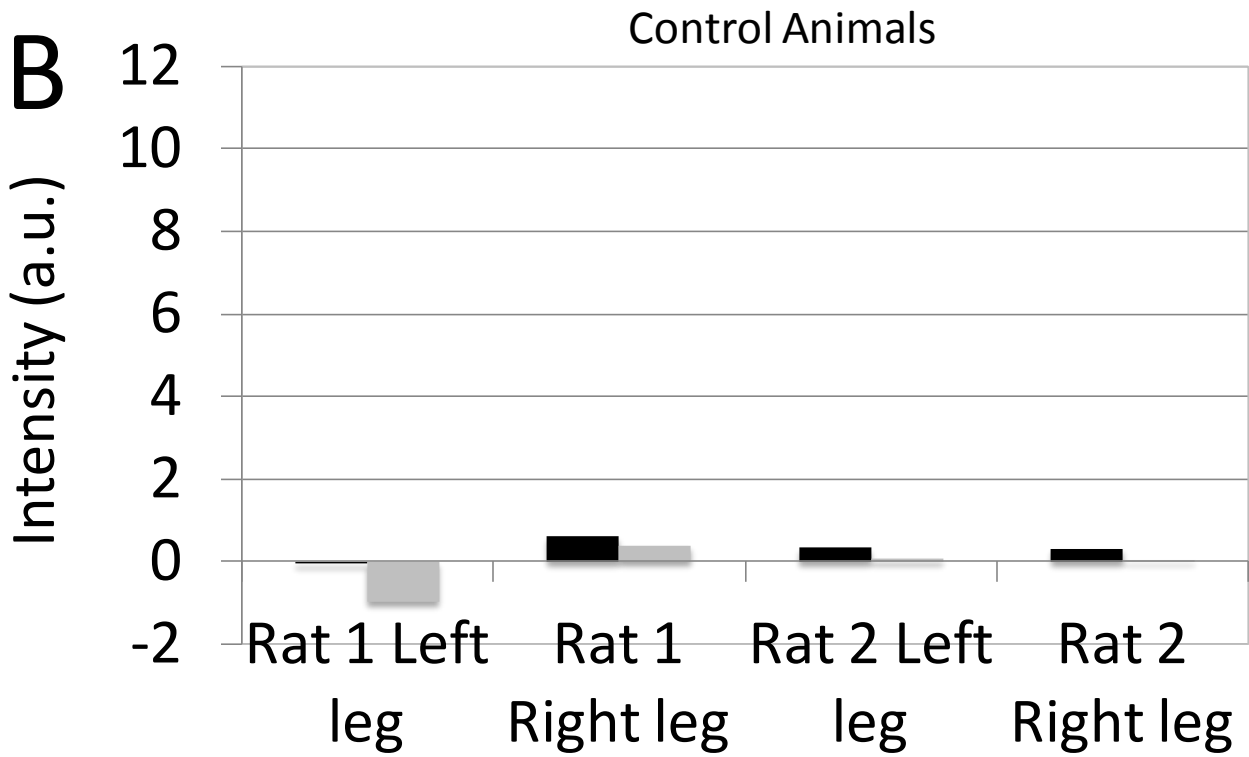

Supplement: NIHMS502188-supplement-5.pdf [file NIHMS502188-supplement-5.pdf]
